# Supplementary material for: Synthesis and dielectric properties of the eco-friendly insulating gas thiazyl trifluoride
Source: Royal Society of Chemistry journal article supplement (doi:10.1039/c9ra09256k), 2020-01-01
Supplement: c9ra09256k1.pdf [file c9ra09256k1.pdf]

## SUPPORTING INFORMATION

### Synthesis and Dielectric Properties of the Eco-friendly Insulating Gas Thiazyl Trifluoride

*Jiayan Deng<sup>1</sup>, Ming Peng<sup>1</sup>, Zhanyang Gao<sup>1</sup>, Yi Wang<sup>1</sup>, Baoshan Wang<sup>1</sup>,  
Wenjun Zhou<sup>2</sup>, Ruichao Peng<sup>1\*</sup> and Yunbai Luo<sup>1\*</sup>*

1. Engineering Research Center of Organosilicon Compounds & Materials,  
Ministry of Education, College of Chemistry & Molecular Sciences, Wuhan  
University, Wuhan 430072, P. R. China

2. School of Electrical Engineering and Automation, Wuhan University, Wuhan  
430072, P. R. China

\*Corresponding author E-mail: [prc@whu.edu.cn](mailto:prc@whu.edu.cn); [ybai@whu.edu.cn](mailto:ybai@whu.edu.cn). Phone: +86-27-  
6875-2511. Fax: +86-27-6875-2511

**Table S1.** The MSDS information of the chemicals involved in the reaction.

|                         | CAS<br>number | Toxicity <sup>a</sup>                                                                                   |
|-------------------------|---------------|---------------------------------------------------------------------------------------------------------|
| sulfur<br>monochloride  | 10025-67-9    | LD50 orally in Rabbit: 132 mg/kg                                                                        |
| carbon<br>tetrachloride | 56-23-5       | LC50 for mice: 9528 ppm (Svirbely);<br>LD50 orally in rats, mice, dogs (g/kg): 2.92, 12.1-<br>14.4, 2.3 |
| 1,4-Dioxane             | 123-91-1      | LD50 orally in mice, rats (ml/kg): 5.7, 5.2 (Laug)                                                      |
| Benzene                 | 71-43-2       | LD50 orally in young adult rats: 3.8 ml/kg (Kimura)                                                     |
| Ammonia                 | 7664-41-7     | LD50 oral (rat) 350 mg/kg<br>LC50 inhal (rat) 2000 ppm (4 h)                                            |
| Silver(II) fluoride     | 7783-95-1     | \ <sup>b</sup>                                                                                          |

<sup>a</sup> According to the Chemical Book.

<sup>b</sup> No related data.

**Table S2.** Reaction energy of radical decomposition of NSF<sub>3</sub>

| Reactant → Product | E <sub>1</sub> <sup>a</sup> (Hartree) | E <sub>2</sub> <sup>b</sup> (Hartree) <sup>c</sup> | E <sub>2</sub> -E <sub>1</sub> (kcal/mol) |
|--------------------|---------------------------------------|----------------------------------------------------|-------------------------------------------|
| A → B + Frad       | -752.32145                            | -752.228408                                        | 58.2163794                                |
| A → C + Nrad       | -752.32145                            | -752.32145                                         | 77.7031802                                |
| C → D + Frad       | -697.597739                           | -697.549037                                        | 30.4728414                                |

<sup>a</sup> Energy of reactant.

<sup>b</sup> Energy of product.

<sup>c</sup> 1 Hartree = 2625.5 kJ/mol = 27.21 eV = 627.51 kcal/mol

**Table S3.** Physical and environmental properties of common dielectric gases

|                                                    | NSF <sub>3</sub> | CF <sub>3</sub> I | c-C <sub>4</sub> F <sub>8</sub> | C <sub>5</sub> F <sub>10</sub> O | C <sub>4</sub> F <sub>7</sub> N | SF <sub>6</sub> |
|----------------------------------------------------|------------------|-------------------|---------------------------------|----------------------------------|---------------------------------|-----------------|
| Molecular Weight (MW)                              | 103.07           | 195.91            | 200.3                           | 266.03                           | 195.04                          | 146.05          |
| Electric strength relative to SF <sub>6</sub> (Er) | 1.35             | 1.23              | 1.25                            | 1.2                              | 2.17                            | 1               |
| Boiling point/°C                                   | -27              | -22.5             | -6                              | 26.5                             | -4.7                            | -63             |
| Atmospheric lifetime (τ)/years                     | 5                | 0.005             | 3200                            | 0.04                             | 35                              | 3200            |
| Global Warming Potential (GWP)                     | 916              | 1~5               | 8700                            | 1                                | 2100                            | 23900           |
